# Supplementary material
Source: PubMed Central journal article supplement (PMC10355931)
Supplement: 12672_2017_295_MOESM1_ESM.pdf [file 12672_2017_295_MOESM1_ESM.pdf]

# Supplementary figure 1

**A** Ishikawa

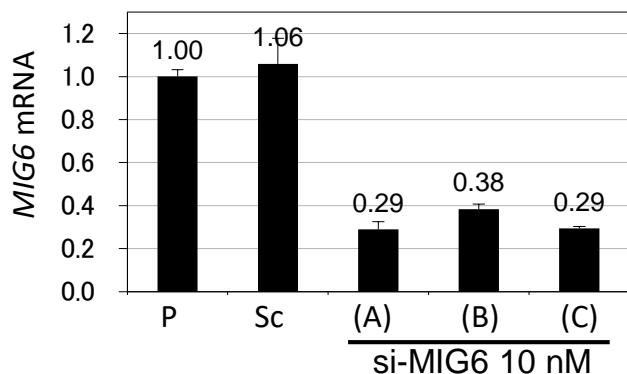

**B**

Ishikawa

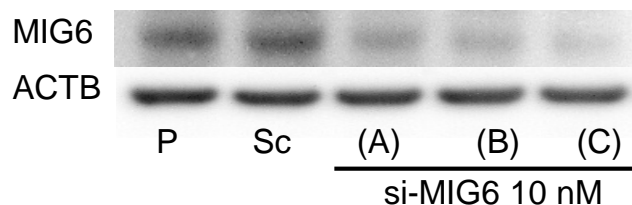

**C** HEC1B

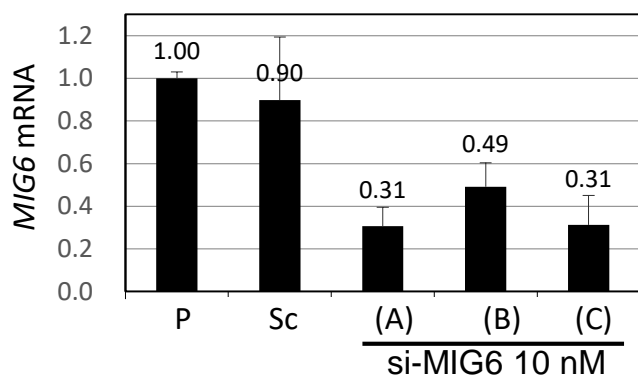

**D**

HEC1B

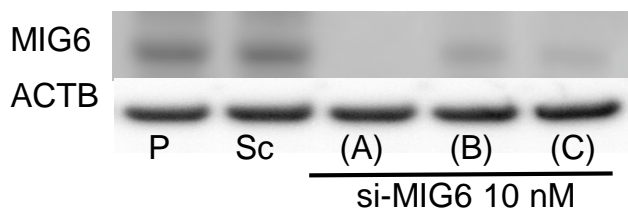

**E** Ishikawa

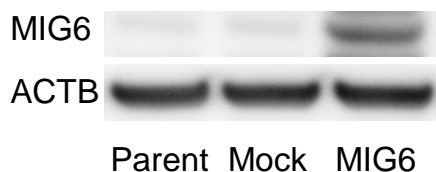

**F** HEC1B

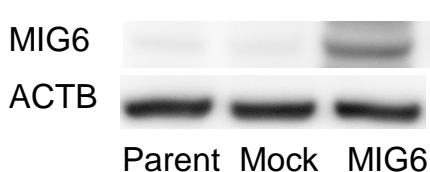

**G** AN3CA

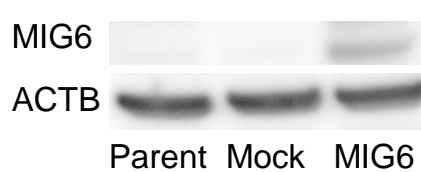

**A, B:** Results of the transfection of *MIG6* siRNA into Ishikawa cells. (**A:** *MIG6* mRNA, **B:** protein) **C, D:** Results of the transfection of *MIG6* siRNA into HEC1B cells. (**C:** *MIG6* mRNA, **D:** protein) **E, F:** Results of the transfection of *MIG6* cDNA into Ishikawa cells (**E**) and HEC1B cells (**F**). Cells were harvested at 24 hours after transfection. P or Parent: parent cells without transfection, si-MIG6 (A)-(C): *MIG6* siRNA (A)-(C) transfected cells, Sc: scrambled negative control siRNA transfected cells, Mock: empty vector transfected cells, MIG6: *MIG6* cDNA transfected cells.
