# Supplementary material
Source: PubMed Central journal article supplement (PMC10355931)
Supplement: 12672_2017_295_MOESM2_ESM.pdf [file 12672_2017_295_MOESM2_ESM.pdf]

# Supplementary figure 2

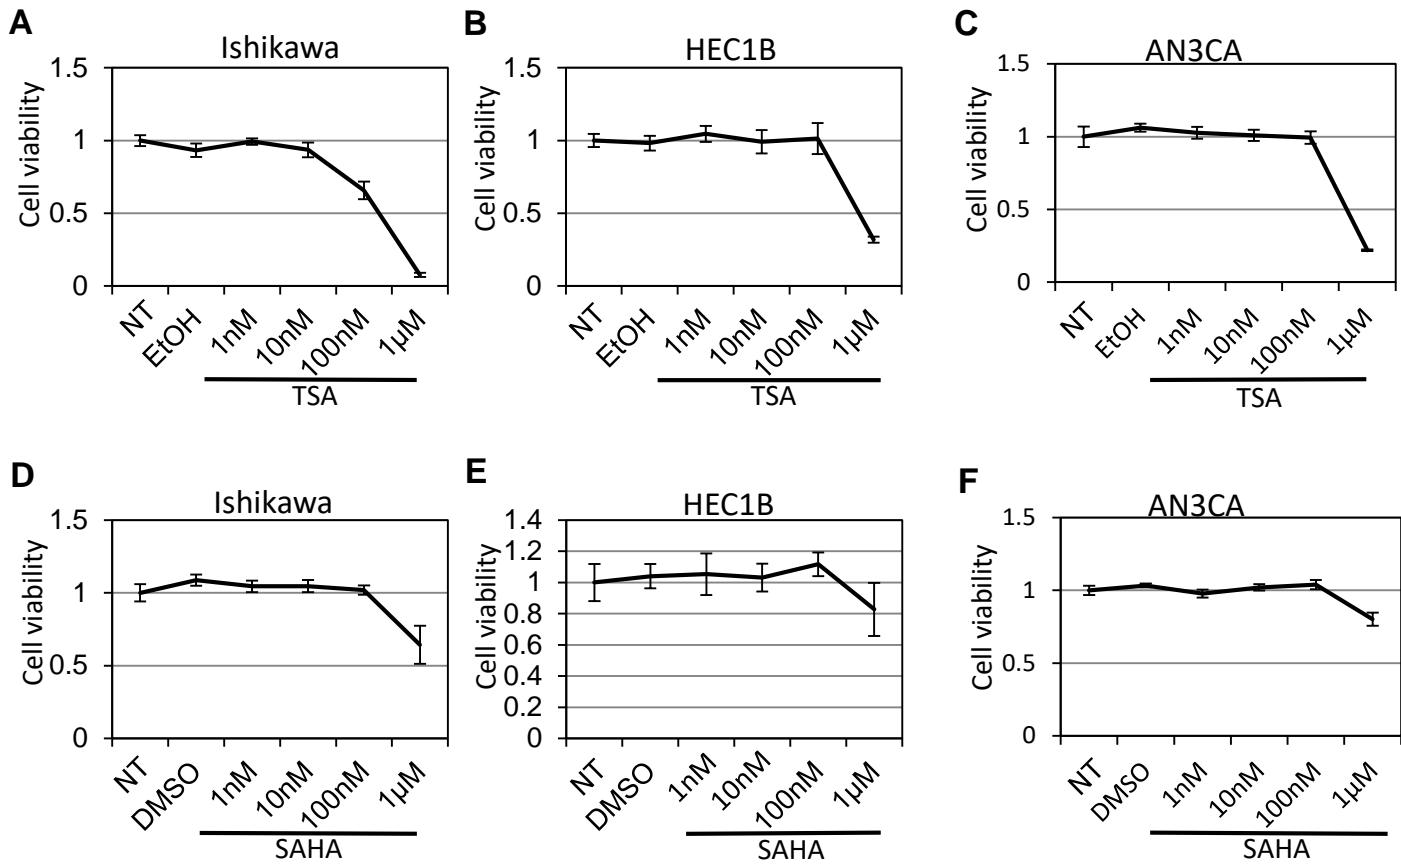

**A-C:** Effects of TSA on the viability of Ishikawa (**A**), HEC1B (**B**), and AN3CA (**C**) cells examined by the WST-1 assay. **D-E:** Effects of SAHA on the viability of Ishikawa (**D**), HEC1B (**E**), and AN3CA (**F**) cells. WST-1 assay was performed at 72hours after the treatment. NT: no treatment, EtOH: treated with ethanol (solvent of TSA), DMSO: treated with DMSO (solvent of SAHA).
