# Supplementary material
Source: PubMed Central journal article supplement (PMC10355931)
Supplement: 12672_2017_295_MOESM4_ESM.pdf [file 12672_2017_295_MOESM4_ESM.pdf]

# Supplementary Figure 4

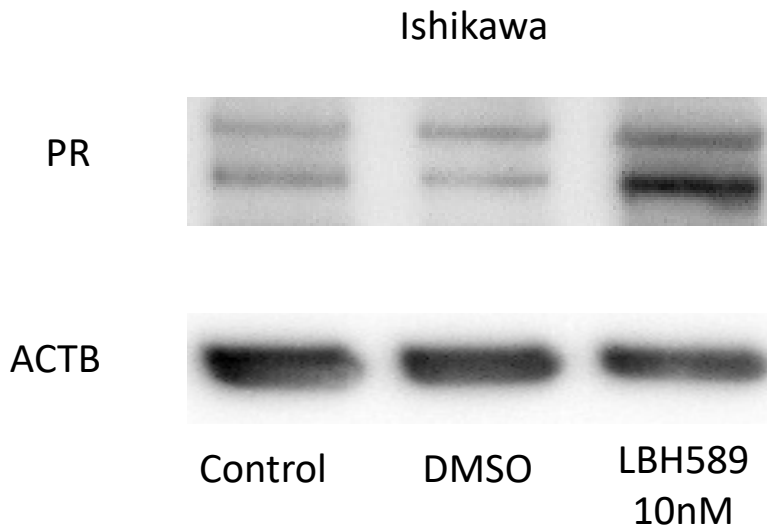

The expression of PR protein in Ishikawa cells at 24 hours after the treatment of LBH589. The expression of PR protein was enhanced by 10 nM of LBH589. Control: no treatment, DMSO: treated with DMSO (solvent of LBH589).
