# Supplementary material
Source: PubMed Central journal article supplement (PMC10355931)
Supplement: 12672_2017_295_MOESM5_ESM.pdf [file 12672_2017_295_MOESM5_ESM.pdf]

# Supplementary figure 5

## Ishikawa

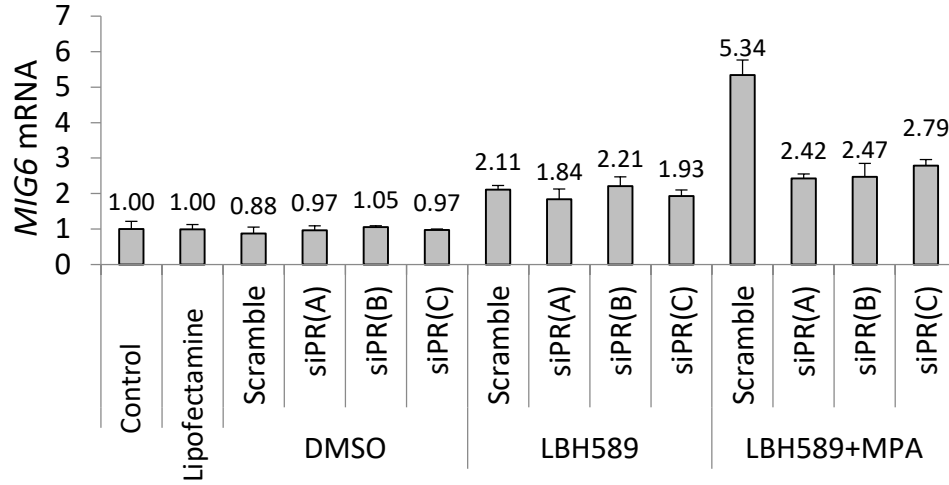

## HEC1B

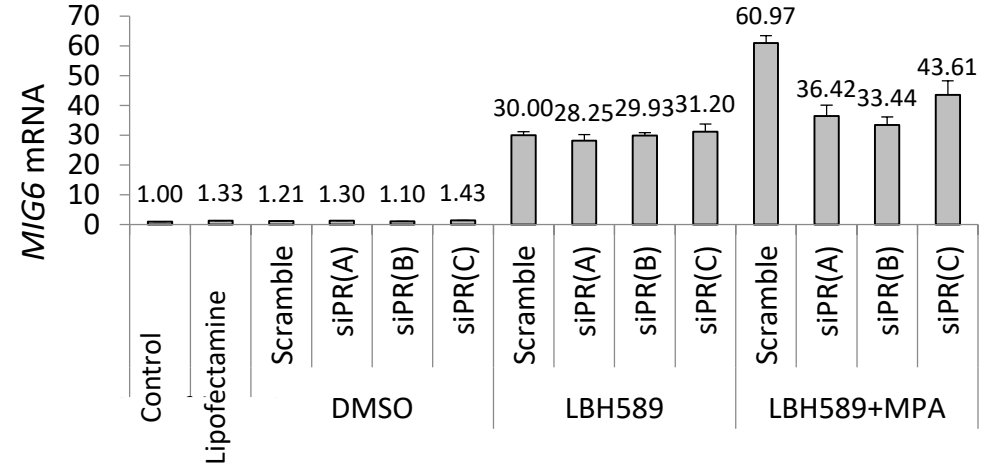

## AN3CA

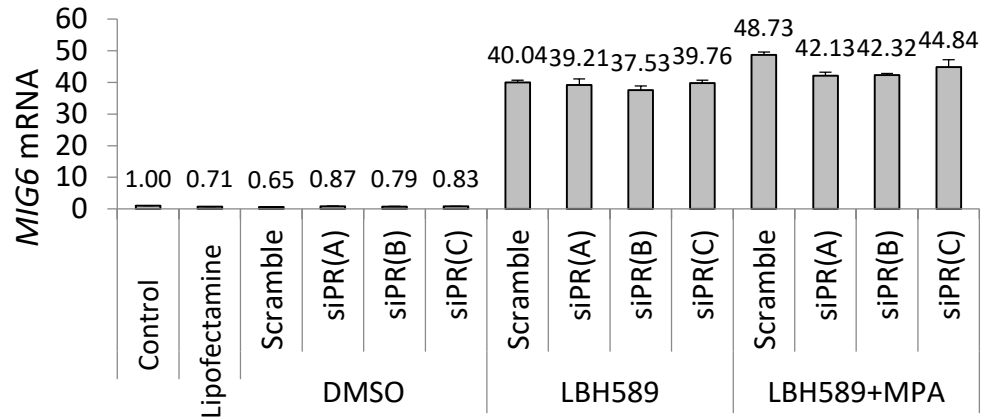

Effects of *PR*-silencing by *PR*-siRNA (si-*PR*(A)-(C)) on the expression of *MIG6* mRNA in Ishikawa cells treated by LBH589 (10nM, for 48 hours) and MPA (100nM, for 24 hours). The synergistic effect of the combination treatment with LBH589 and MPA was canceled by *PR*-silencing. Control: no treatment, DMSO: treated with DMSO (solvent of LBH589).
