# Supplementary material
Source: PubMed Central journal article supplement (PMC10355931)
Supplement: 12672_2017_295_MOESM6_ESM.pdf [file 12672_2017_295_MOESM6_ESM.pdf]

# Supplementary figure 6

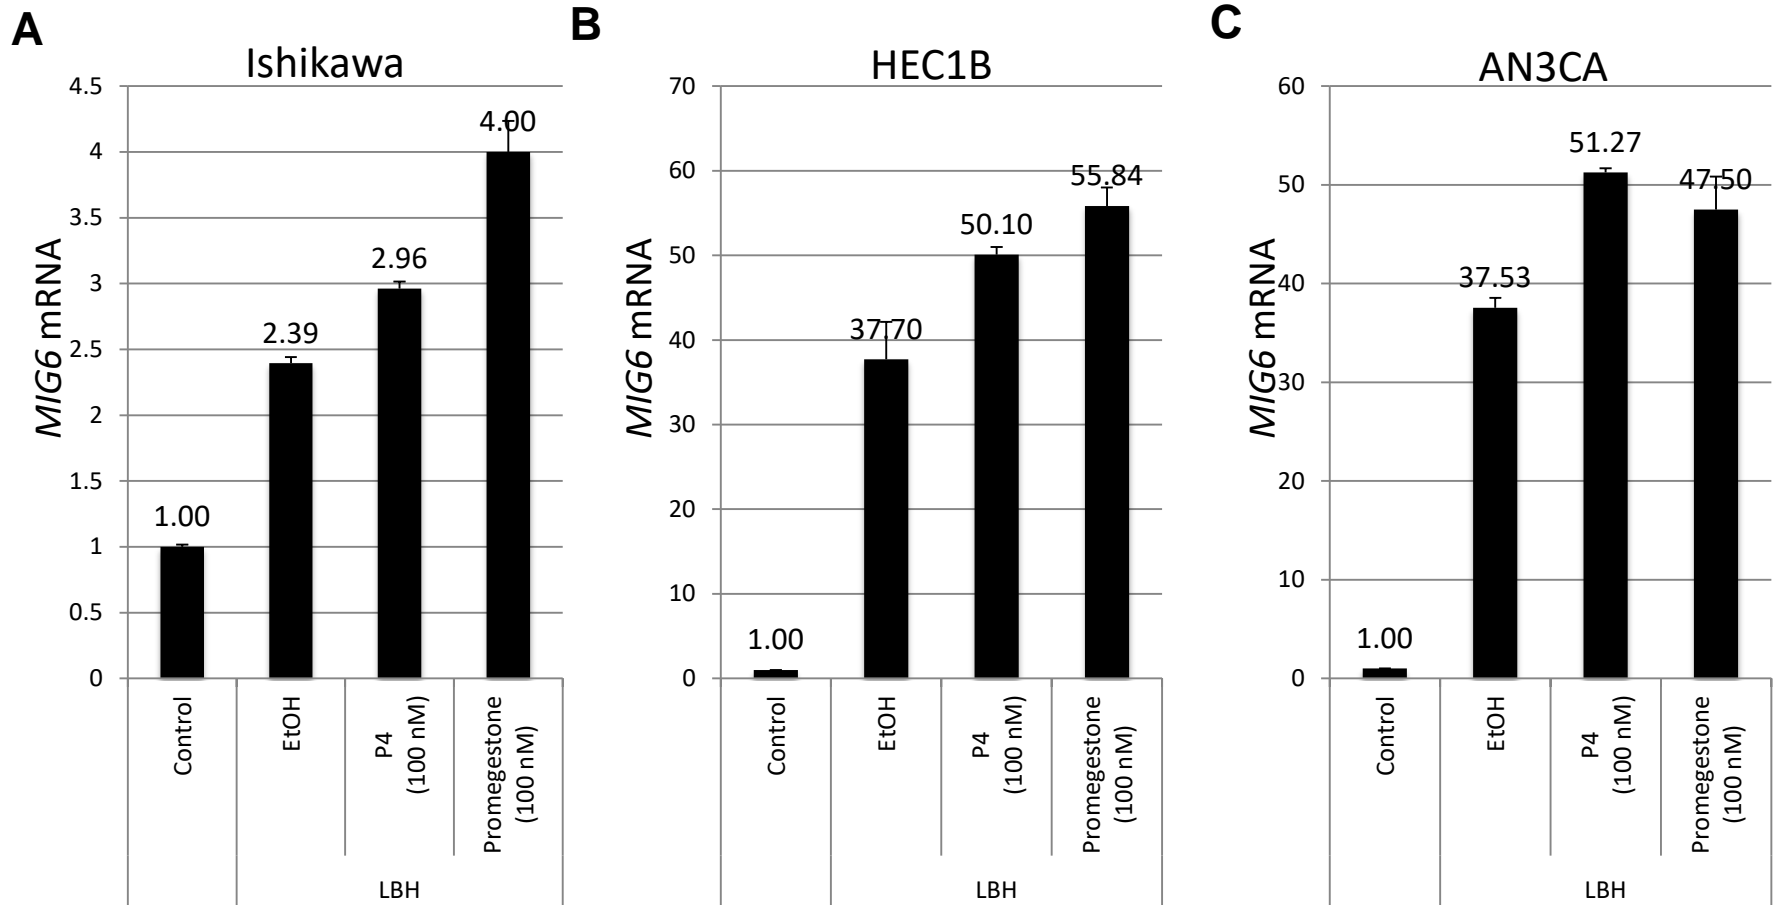

Effects of progesterone (P4, 100nM, for 24 hours) or Promegestone (100nM, for 24 hours) on the expression of *MIG6* mRNA in Ishikawa (A), HEC1B (B), and AN3CA (C) treated by LBH589 (10nM, for 48 hours). Control: no treatment, EtOH: treated with ethanol (solvent of progestins).
