# Supplementary material
Source: PubMed Central journal article supplement (PMC10355931)
Supplement: 12672_2017_295_MOESM7_ESM.pdf [file 12672_2017_295_MOESM7_ESM.pdf]

# Supplementary figure 7

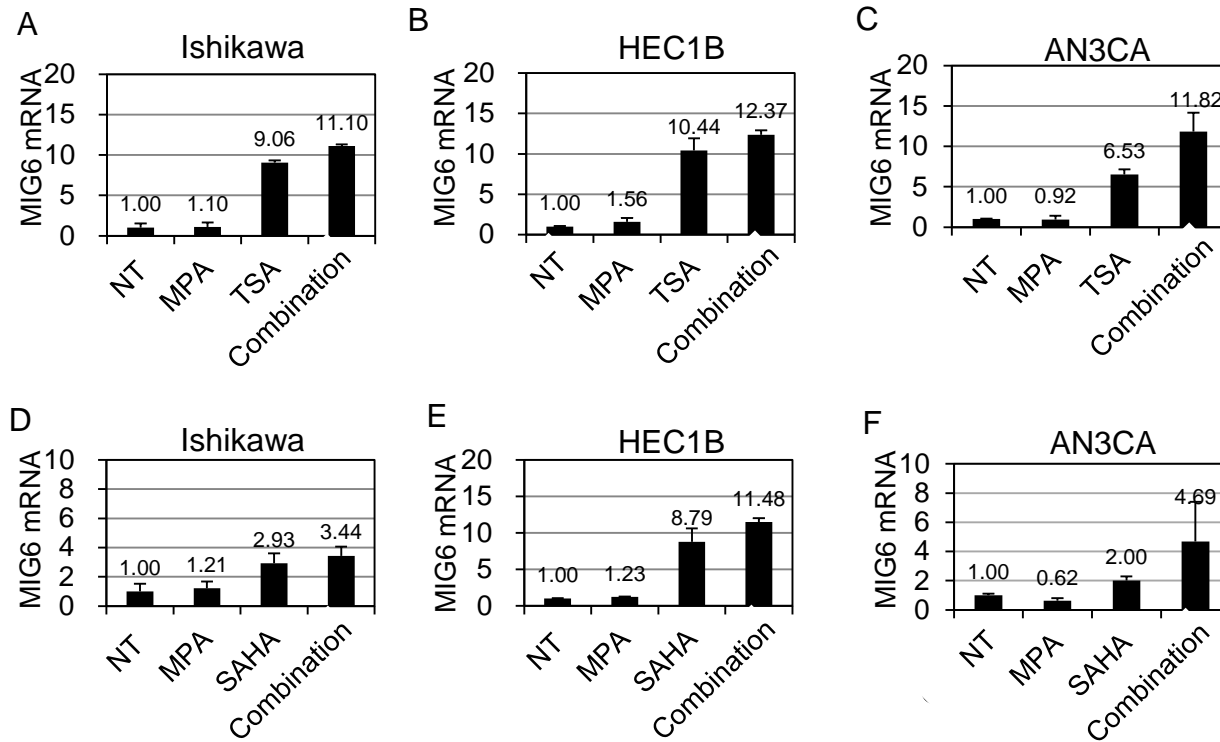

**A-C:** Effects of TSA and/ or MPA on the expression of *MIG6* mRNA in Ishikawa (**A**), HEC1B (**B**), and AN3CA (**C**) cells examined by RT-PCR. **D-E:** Effects of SAHA and/ or MPA on the expression of *MIG6* mRNA in Ishikawa (**D**), HEC1B (**E**), and AN3CA (**F**) cells. NT: no treatment.
