# Supplementary material
Source: PubMed Central journal article supplement (PMC10355931)
Supplement: 12672_2017_295_MOESM8_ESM.pdf [file 12672_2017_295_MOESM8_ESM.pdf]

# Supplementary figure 8

## HEC1B

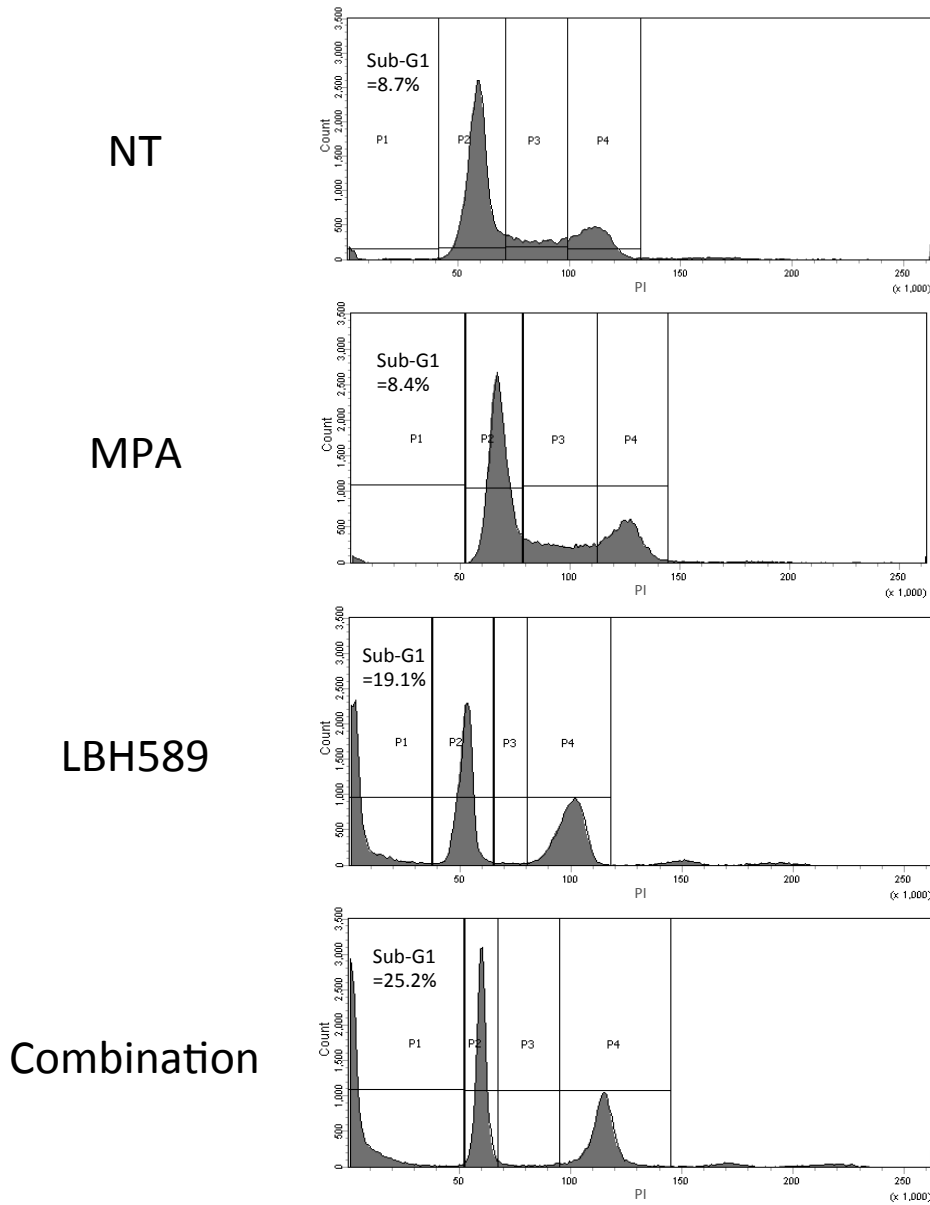

Representative results of flow cytometry of propidium iodide (PI) staining in HEC1B cells treated with 10nM of LBH589 and/or 100nM of MPA for 48 hours. P1 indicates sub-G1 fraction.
